# Supplementary material for: Enhancement of glycerol metabolism in the oleaginous marine diatom Fistulifera solaris JPCC DA0580 to improve triacylglycerol productivity
Source: PubMed Central journal article supplement (PMC4308894; doi:10.1186/s13068-014-0184-9), 2015-01-22

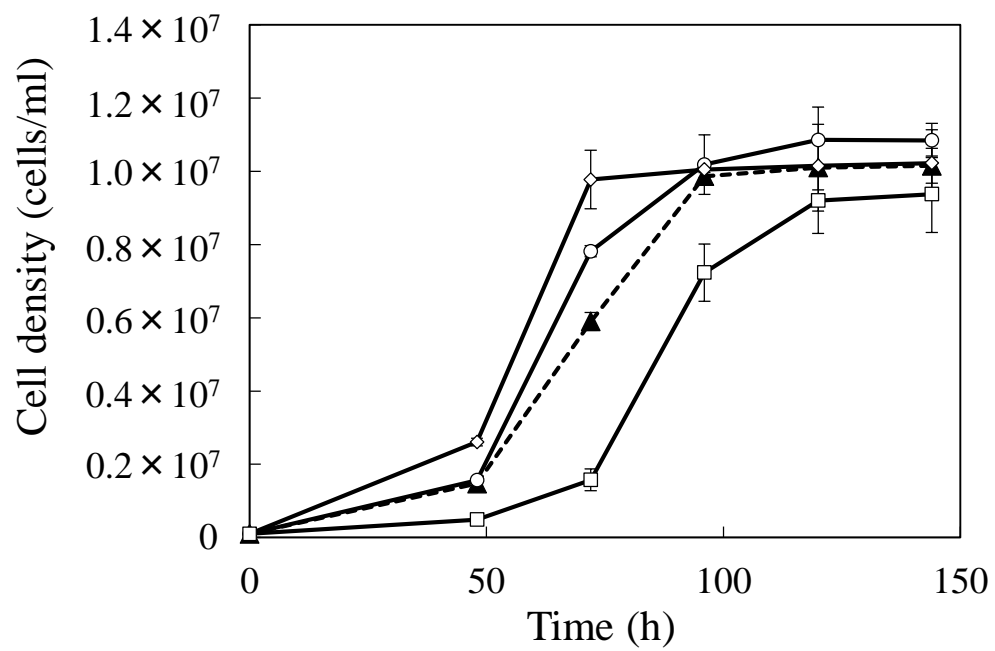

Supplement: 13068_2014_184_MOESM1_ESM.pdf [file 13068_2014_184_MOESM1_ESM.pdf]
