# Supplementary material for: Enhancement of glycerol metabolism in the oleaginous marine diatom Fistulifera solaris JPCC DA0580 to improve triacylglycerol productivity
Source: PubMed Central journal article supplement (PMC4308894; doi:10.1186/s13068-014-0184-9), 2015-01-22
Supplement: 13068_2014_184_MOESM4_ESM.pdf [file 13068_2014_184_MOESM4_ESM.pdf]

| Gene                          | Accession No. | Primer name          | Sequence                                            | Amplicon size (bp) |
|-------------------------------|---------------|----------------------|-----------------------------------------------------|--------------------|
| <b>Used for PCR detection</b> |               |                      |                                                     |                    |
| <i>nptII</i>                  | -             | nptIIFw<br>nptIIRv   | ATGATTGAACAAGATGGATTGC<br>TCAGAAGAAGCTCGTCAAGAAGG   | 795                |
| glycerol kinase               | XXX, XXX      | GKFw<br>GKRv         | ATTTGACTGCTACAGAATTCATGC<br>TTGTTCTGCAGTTAGTTTAAGCG | 1900               |
| <b>Used for Real-time PCR</b> |               |                      |                                                     |                    |
| glycerol kinase               | XXXX          | g11728Fw<br>g11728Rv | AGCTACTTCGCTGGGACAAA<br>GAAAGACGAGCCAAGAATCG        | 127                |
|                               | XXX           | g14921Fw<br>g14921Rv | AACGACCCCTGACAATGAAG<br>GAGGCTGTCATCCCAACAAT        | 108                |
| GAPDH                         | XXXX          | g19411Fw<br>g19411Rv | ATTGGAGTCAATGGCTTTGG<br>GCCATGAACGGAATCGTACT        | 147                |
| rps                           | XXXX          | g2459Fw<br>g2459Rv   | CAAGAGAACGGCAAATTGGT<br>TTTGAGGGCCTTGACGATAC        | 108                |
| Ub                            | XXXX          | g19562Fw<br>g19562Rv | GCCGGTAAACAATTGGAAGA<br>GCCTTGTCGCAGTTGAATTT        | 146                |
